# Supplementary material for: Comparative Analysis of Hematological and Immunological Parameters in Patients with Primary Sjögren’s Syndrome and Peripheral Neuropathy
Source: MDPI journal article supplement (doi:10.3390/jcm12113672), 2023-05-25
Supplement: s1 [file s1]

**Table S1.** Comparative analysis of the ESSDAI domains between the two groups.

|                               | PN+ Group        | PN- Group        | <i>p</i> -Value           |
|-------------------------------|------------------|------------------|---------------------------|
|                               | No = 31 (25.61%) | No = 90 (74.38%) |                           |
| Constitutional, <i>n</i> (%)  | 0                | 0                | -                         |
| Lymphadenopathy, <i>n</i> (%) | 5 (16.12%)       | 20 (22.22%)      | 0.328 <sup>a</sup>        |
| Glandular, <i>n</i> (%)       | 15 (48.38%)      | 68 (75.55%)      | <b>0.006</b> <sup>a</sup> |
| Articular, <i>n</i> (%)       | 19 (61.29%)      | 55 (61.11%)      | 0.581 <sup>a</sup>        |
| Cutaneous, <i>n</i> (%)       | 12 (38.70%)      | 22 (24.44%)      | 0.471 <sup>a</sup>        |
| Pulmonary, <i>n</i> (%)       | 10 (32.25%)      | 17 (18.88%)      | 0.138 <sup>a</sup>        |
| Renal, <i>n</i> (%)           | 10 (32.25%)      | 13 (14.44%)      | <b>0.031</b> <sup>a</sup> |
| Muscular, <i>n</i> (%)        | 4 (12.90%)       | 15 (16.66%)      | 0.429 <sup>a</sup>        |
| Hematological, <i>n</i> (%)   | 13 (41.93%)      | 38 (42.22%)      | 0.575 <sup>a</sup>        |
| Biological, <i>n</i> (%)      | 13 (41.93%)      | 19 (21.11%)      | <b>0.023</b> <sup>a</sup> |

Abbreviations: PN, peripheral neuropathy. <sup>a</sup> Chi- Square; statistical significance <0.05.
